# Supplementary material for: Mechanism of antimicrobial activity of honeybee (Apis mellifera) venom on Gram-negative bacteria: Escherichia coli and Pseudomonas spp
Source: PubMed Central journal article supplement (PMC8035396; doi:10.1186/s13568-021-01214-8), 2021-04-09
Supplement: 13568_2021_1214_MOESM1_ESM.pdf [file 13568_2021_1214_MOESM1_ESM.pdf]

1 Mechanism of antimicrobial activity of  
2 honeybee (*Apis mellifera*) venom on Gram-  
3 negative bacteria: *Escherichia coli* and  
4 *Pseudomonas* spp.  
5

6 Izlem HAKTANIR<sup>a,\*</sup>, Maria MASOURA<sup>a</sup>, Fani Th MANTZOURIDOU<sup>b</sup>, Konstantinos  
7 GKATZIONIS<sup>a,c,\*</sup>

8 a School of Chemical Engineering, University of Birmingham, Edgbaston, Birmingham B15 2TT,  
9 United Kingdom

10 b Laboratory of Food Chemistry and Technology, Department of Chemistry, Aristotle University of  
11 Thessaloniki, 541 24 Thessaloniki, Greece

12 c Department of Food Science and Nutrition, School of the Environment, University of the Aegean,  
13 Metropolitoe Ioakeim 2, GR 81400 Myrina, Lemnos, Greece

14 \*Corresponding author:

15 Konstantinos Gkatzionis, email: [kgkatzionis@aegean.gr](mailto:kgkatzionis@aegean.gr); telephone: +306972567325

16 Izlem Haktanir, email: [izlemhaktanir@gmail.com](mailto:izlemhaktanir@gmail.com) ; telephone:+4407460805150

22 Table S1. Composition of dry honeybee venom, (Shipolini, 1984; Pucca et al., 2019)

| <b>Class of molecules</b>                                                 | <b>Compound</b>                                               | <b>Amount (% of venom, dry weight)</b> |
|---------------------------------------------------------------------------|---------------------------------------------------------------|----------------------------------------|
| <b>Enzymes</b>                                                            | Phospholipase A <sub>2</sub> <sup>b</sup>                     | 10-12                                  |
|                                                                           | Hyaluronidase <sup>a</sup>                                    | 1,5-2                                  |
| <b>Peptides</b>                                                           | Melittin <sup>a</sup>                                         | 40-50                                  |
|                                                                           | Apamin                                                        | 3                                      |
|                                                                           | Mast Cell Degranulating Peptide (MCDP)                        | 2                                      |
| <b>Amines</b>                                                             | Histamine <sup>c</sup>                                        | 0.6-1.6                                |
|                                                                           | Dopamine                                                      | 0.13-1                                 |
| <b>Carbohydrates</b>                                                      | Glucose                                                       | 0.7                                    |
|                                                                           | Fructose                                                      | 0.9                                    |
| <b>Amino acids</b>                                                        | $\gamma$ -aminobutyric acid and $\beta$ -aminoisobutyric acid | 1                                      |
| <b>Lipids</b>                                                             |                                                               | 5                                      |
| <b>Minerals</b>                                                           | P, Ca, Mg                                                     | 3-4                                    |
| a: minor allergen / potent allergen, b: major allergen, c: biogenic amine |                                                               |                                        |

23

24

25

26

27

28

29 Table S2: Summary of studies on antimicrobial activity of honeybee venom against bacteria.

| Component | Bacteria                     |                             | Strains     | Assay       | MIC (µg/mL) | MBC (µg/mL) | References                |                           |
|-----------|------------------------------|-----------------------------|-------------|-------------|-------------|-------------|---------------------------|---------------------------|
|           | Gram positive                | Gram negative               |             |             |             |             |                           |                           |
| Bee venom |                              | <i>Ac. baumannii</i><br>BAA | ATCC 747    | MM          | 30          | 60          | Al-Ani et al., 2015       |                           |
|           | <i>B. subtilis</i>           |                             | ATCC 6051   | MM          | 8           | 10          |                           |                           |
|           |                              | <i>Bur. mallei</i>          | RTCC 2375   | ADM         |             |             | Zolfagharian et al., 2016 |                           |
|           |                              | <i>Bur. pseudomallei</i>    | RTCC 2375   | ADM         |             |             |                           |                           |
|           |                              | <i>E. coli</i>              | ATCC 35218  | BDM         | ND          |             | Hegazi et al., 2017       |                           |
|           |                              |                             | ATCC 25922  | MM          | 60          | 60          | Al-Ani et al., 2015       |                           |
|           |                              |                             | SR 200756   | MM          | 100         | 200         |                           |                           |
|           |                              |                             | KL 206272   | MM          | 200         | 200         |                           |                           |
|           |                              |                             |             |             | ADM         | NA          | NA                        | Perumal Samy et al., 2007 |
|           |                              | <i>E. coli</i><br>O157:H7   | ATCC 35150  | MM          | 100         | 200         | Al-Ani et al., 2015       |                           |
|           |                              |                             | ATCC 25923  |             |             |             | Zolfagharian et al., 2016 |                           |
|           |                              | <i>En. aerogenes</i>        | -           | ADM         | NA          | NA          | Perumal Samy et al., 2007 |                           |
|           |                              | <i>Ent. casseliflavus</i>   |             | ATCC 700327 | MM          | 10          | 30                        | Al-Ani et al., 2015       |
|           |                              | <i>Ent. feacalis</i>        |             |             | BDM         | ND          |                           | Hegazi et al., 2017       |
|           |                              |                             | ATCC 29212  | MM          | 100         | 200         | Al-Ani et al., 2015       |                           |
|           |                              |                             | ATCC 4082   | MM          | 20          | -           | Leandro et al., 2015      |                           |
|           | <i>Ent. feacalis</i><br>VanB |                             | ATCC 51299  | MM          | 200         | 500         | Al-Ani et al., 2015       |                           |
|           | <i>Ent. VRE</i>              |                             | ATCC 902291 | MM          | 200         | 500         |                           |                           |
|           |                              |                             |             | ATCC 102105 | MM          | 200         | 500                       |                           |

|                          |                          |             |           |     |      |                           |                           |
|--------------------------|--------------------------|-------------|-----------|-----|------|---------------------------|---------------------------|
|                          |                          | ATCC 902316 | MM        | 200 | 500  |                           |                           |
|                          | <i>K. pneumoniae</i>     | ATCC 27736  | BDM       | ND  |      | Hegazi et al., 2017       |                           |
|                          |                          | ATCC 700603 | MM        | 30  | 60   | Al-Ani et al., 2015       |                           |
|                          |                          | ATCC 800877 | MM        | 500 | 500  |                           |                           |
|                          |                          | KL 206436   | MM        | 500 | 500  |                           |                           |
|                          | <i>K. oxytoca</i>        | ATCC 700324 | MM        | 500 | 500  |                           |                           |
| <i>Lact. casei</i>       |                          | EMCC 1093 T | BDM       | ND  |      | Hegazi et al., 2017       |                           |
|                          |                          | ATCC 11578  | MM        | 20  | -    | Leandro et al., 2015      |                           |
| <i>Lis. monocytogene</i> |                          |             | BDM       | ND  | -    | Hegazi et al., 2017       |                           |
| <i>Myc. smegmatis</i>    |                          | ATCC 19420  | MM        | 200 | 200  | Al-Ani et al., 2015       |                           |
| <i>Myc. fortuitum</i>    |                          | ATCC 6841   | MM        | 100 | 100  |                           |                           |
| <i>Myc. phlei</i>        |                          | ATCC 11758  | MM        | 800 | 800  |                           |                           |
|                          | <i>Pr. mirabilis</i>     | -           | ADM       | -   | -    | Perumal Samy et al., 2007 |                           |
|                          | <i>Pr. vulgaris</i>      | -           | ADM       | -   | -    |                           |                           |
|                          | <i>P. aeruginosa</i>     | ATCC 27853  | BDM       | ND  | -    | Hegazi et al., 2017       |                           |
|                          |                          |             | MM        | 500 | >500 | Al-Ani et al., 2015       |                           |
|                          |                          |             |           |     |      | Zolfagharian et al., 2016 |                           |
|                          |                          |             | KL 206466 | MM  | 500  | >500                      | Al-Ani et al., 2015       |
|                          |                          |             | KL 206444 | MM  | >500 | >500                      |                           |
|                          |                          |             | -         | ADM | -    | -                         | Perumal Samy et al., 2007 |
|                          | <i>Sal. choleraesuis</i> | ATCC 554    | MM        | 500 | >500 | Al-Ani et al., 2015       |                           |
|                          | <i>Sal. typhimurium</i>  | ATCC 25923  |           |     |      | Zolfagharian et al., 2016 |                           |
|                          | <i>Sh. flexneri</i>      | ATCC 29903  | MM        | 60  | 100  | Al-Ani et al., 2015       |                           |
| <i>Staph. aureus</i>     |                          | ATCC 25923  | BDM       | ND  | -    | Hegazi et al., 2017       |                           |

|                             |              |  |     |           |     |                           |
|-----------------------------|--------------|--|-----|-----------|-----|---------------------------|
|                             |              |  |     |           |     | Zolfagharian et al., 2016 |
|                             |              |  | MM  | 10        | 30  | Al-Ani et al., 2015       |
|                             | ATCC 29213   |  | MM  | 60        | 200 |                           |
|                             | USA300 (LAC) |  | MM  | 0.78      | ND  | Choi et al., 2015         |
|                             | Newman       |  | MM  | 0.78      | ND  |                           |
|                             | MW2          |  | MM  | 1.56      | ND  |                           |
|                             | MRSA1        |  | MM  | 3.12      | ND  |                           |
|                             | MRSA2        |  | MM  | 1.56      | ND  |                           |
|                             | ISP4790      |  | MM  | 6.25      | ND  |                           |
|                             | MU50         |  | MM  | 6.25      | ND  |                           |
|                             | ATCC 6538P   |  |     | 17        | ND  | Kokot et al., 2009        |
|                             | -            |  | ADM | 23.2±1.09 | -   | Perumal Samy et al., 2007 |
| <i>Staph. aureus</i> BAA    | ATCC 977     |  | MM  | 30        | 60  | Al-Ani et al., 2015       |
| <i>Staph. aureus</i> MRSA   | ATCC 1042    |  | MM  | 60        | 100 |                           |
|                             | ATCC 106804  |  | MM  | 60        | 200 |                           |
|                             | ATCC 106188  |  | MM  | 60        | 100 |                           |
|                             | ATCC 106091  |  | MM  | 60        | 200 |                           |
| <i>Staph. epidermidis</i>   | ATCC 14990   |  | MM  | 60        | 100 |                           |
| <i>Staph. saprophyticus</i> | ATCC 15305   |  | MM  | 10        | 10  |                           |
| <i>Strep. agalactiae</i>    | ATCC 27956   |  | MM  | 40        | 40  | Choi et al., 2015         |
|                             | CNCTC 10/84  |  | MM  | 6.25      | ND  |                           |
| <i>Strep. bovis</i>         | NEM 760      |  | MM  | 1.56      | ND  |                           |
| <i>Strep. epidermidis</i>   | RP62a        |  | MM  | 0.78      | ND  |                           |
| <i>Strep. gordonii</i>      | M99          |  | MM  | 6.25      | ND  |                           |
| <i>Strep. mitis</i>         | ATCC 49452   |  | MM  | 40        | -   | Leandro et al., 2015      |
| <i>Strep. mutans</i>        | EMCC 1815T   |  | BDM | ND        | -   | Hegazi et al., 2017       |
|                             | ATCC 25175   |  | MM  | 20        | -   | Leandro et al., 2015      |

|          |                            |                              |             |     |      |     |                      |
|----------|----------------------------|------------------------------|-------------|-----|------|-----|----------------------|
|          | <i>Strep. oralis</i>       |                              | ATCC 35037  | MM  | 100  | 100 | Al-Ani et al., 2015  |
|          | <i>Strep. pneumonia</i>    |                              | TIGR4       | MM  | 3.12 | -   | Choi et al., 2015    |
|          | <i>Strep. pyogenes</i>     |                              |             | BDM | ND   | -   | Hegazi et al., 2017  |
|          |                            |                              | ATCC 12344  | MM  | 100  | 200 | Al-Ani et al., 2015  |
|          | <i>Strep. salivarius</i>   |                              | ATCC 25975  | MM  | 20   | -   | Leandro et al., 2015 |
|          | <i>Strep. sanguinis</i>    |                              | ATCC 10556  | MM  | 30   | -   |                      |
|          | <i>Strep. sobrinus</i>     |                              | ATCC 33478  | MM  | 40   | -   |                      |
|          | <i>Strep. thermophilus</i> |                              | ATCC 19258  | MM  | 30   | 60  | Al-Ani et al., 2015  |
|          |                            |                              |             |     |      |     |                      |
| Melittin |                            | <i>Ac. baumannii</i><br>BAA  | ATCC 747    | MM  | 30   | 30  | Al-Ani et al., 2015  |
|          |                            | <i>B. subtilis</i>           | ATCC 6051   | MM  | 6    | 30  |                      |
|          |                            | <i>E. coli</i>               | ATCC 25922  | MM  | 30   | 60  |                      |
|          |                            |                              | SR 200756   | MM  | 30   | 60  |                      |
|          |                            |                              | KL 206272   | MM  | 30   | 60  |                      |
|          |                            | <i>E. coli</i><br>O157:H7    | ATCC 35150  | MM  | 30   | 60  |                      |
|          |                            | <i>Ent. casseliflavus</i>    | ATCC 700327 | MM  | 8    | 20  |                      |
|          |                            | <i>Ent. faecalis</i>         | ATCC 29212  | MM  | 30   | 100 |                      |
|          |                            |                              | ATCC 4082   | MM  | 6    | -   |                      |
|          |                            | <i>Ent. faecalis</i><br>VanB | ATCC 51299  | MM  | 50   | 100 |                      |
|          |                            | <i>Ent. VRE</i>              | ATCC 902291 | MM  | 50   | 100 | Al-Ani et al., 2015  |
|          |                            | <i>Lact. casei</i>           | ATCC 11578  | MM  | 4    | -   | Leandro et al., 2015 |
|          |                            | <i>K. pneumoniae</i>         | ATCC 700603 | MM  | 100  | 300 | Al-Ani et al., 2015  |
|          |                            |                              | ATCC 800877 | MM  | 100  | 300 |                      |
|          | <i>K. oxytoca</i>          | ATCC 700324                  | MM          | 60  | 500  |     |                      |

|                             |                      |             |     |           |     |                           |
|-----------------------------|----------------------|-------------|-----|-----------|-----|---------------------------|
|                             | <i>P. aeruginosa</i> | ATCC 27853  | MM  | 100       | 100 |                           |
|                             |                      | KL 206466   | MM  | 100       | 100 |                           |
|                             |                      | KL 206444   | MM  | 100       | 100 |                           |
| <i>Staph. aureus</i>        |                      | ATCC 25923  | MM  | 10        | 30  |                           |
|                             |                      | ATCC 29213  | MM  | 6         | 10  |                           |
| <i>Staph. aureus</i> BAA    |                      | ATCC 977    | MM  | 8         | 8   |                           |
| <i>Staph. aureus</i> MRSA   |                      | ATCC 1042   | MM  | 100       | 30  |                           |
|                             |                      | ATCC 106804 | MM  | 30        | 50  |                           |
|                             |                      | ATCC 106188 | MM  | 10        | 50  |                           |
|                             |                      | ATCC 106091 | MM  | 30        | 50  |                           |
| <i>Staph. epidermidis</i>   |                      | ATCC 14990  | MM  | 10        | 30  |                           |
| <i>Staph. saprophyticus</i> |                      | ATCC 15305  | MM  | 10        | 30  |                           |
| <i>Strep. pyogenes</i>      |                      | ATCC 12344  | MM  | 10        | 30  |                           |
| <i>Strep. oralis</i>        |                      | ATCC 35037  | MM  | 200       | 200 |                           |
| <i>Strep. agalactia</i>     |                      | ATCC 27956  | MM  | 30        | 30  |                           |
| <i>Strep. mitis</i>         |                      | ATCC 49452  | MM  | 10        |     | Leandro et al., 2015      |
| <i>Strep. mutans</i>        |                      | ATCC 25175  | MM  | 40        |     |                           |
| PLA <sub>2</sub>            | <i>E. coli</i>       | -           | ADM | NA        | NA  | Perumal Samy et al., 2007 |
|                             | <i>En. aerogenes</i> | -           | ADM | NA        | NA  |                           |
|                             | <i>Ent. feacalis</i> | ATCC 4082   | MM  | NA        | NA  | Leandro et al., 2015      |
| <i>Lact. casei</i>          |                      | ATCC 11578  | MM  | 400       | -   |                           |
|                             | <i>Pr. mirabilis</i> | -           | ADM | NA        | NA  | Perumal Samy et al., 2007 |
|                             | <i>Pr. vulgaris</i>  | -           | ADM | NA        | NA  |                           |
|                             | <i>P. aeruginosa</i> | -           | ADM | NA        | NA  |                           |
| <i>Staph. aureus</i>        |                      | -           | ADM | 13.3±0.83 | -   |                           |
| <i>Strep. mitis</i>         |                      | ATCC 49452  | MM  | NA        | NA  | Leandro et al., 2015      |

|                              | <i>Strep.<br/>mutans</i> |                               | ATCC<br>25175 | MM                          | NA | NA                               |  |
|------------------------------|--------------------------|-------------------------------|---------------|-----------------------------|----|----------------------------------|--|
| Ac.: <i>Acinetobacter</i>    |                          | En.: Enterobacter             |               | Lis.: <i>Listeria</i>       |    | Sal.: <i>Salmonella</i>          |  |
| B.: <i>Bacillus</i>          |                          | Ent.: Enterococcus            |               | Myc.: <i>Mycobacterium</i>  |    | Sh.: <i>Shigella</i>             |  |
| Bur.: <i>Burkholderia</i>    |                          | K.: <i>Klebsiella</i>         |               | Pr.: <i>Proteus</i>         |    | Staph.:<br><i>Staphylococcus</i> |  |
| E.: <i>Escherichia</i>       |                          | Lact.: <i>Lactobacillus</i>   |               | P.: <i>Pseudomonas</i>      |    | Strep.:<br><i>Streptococcus</i>  |  |
| ADM: Agar Dilution<br>Method |                          | BDM: Broth Dilution<br>Method |               | MM: Microdilution<br>Method |    | ND: Not<br>determined            |  |

30

31

32

33

34

35

36

37

38

39

40

41

42

43

44



45 Figure S1. HPLC chromatograms of melittin standard aqueous solution (50 $\mu$ g/mL) (a) BV-1 (b) and  
46 BV-2 (c) aqueous solutions (150 $\mu$ g/mL) at 220nm. Peak (\*): melittin. Detection was at 220nm  
47 (Chromatographic conditions as in Materials and Methods section).

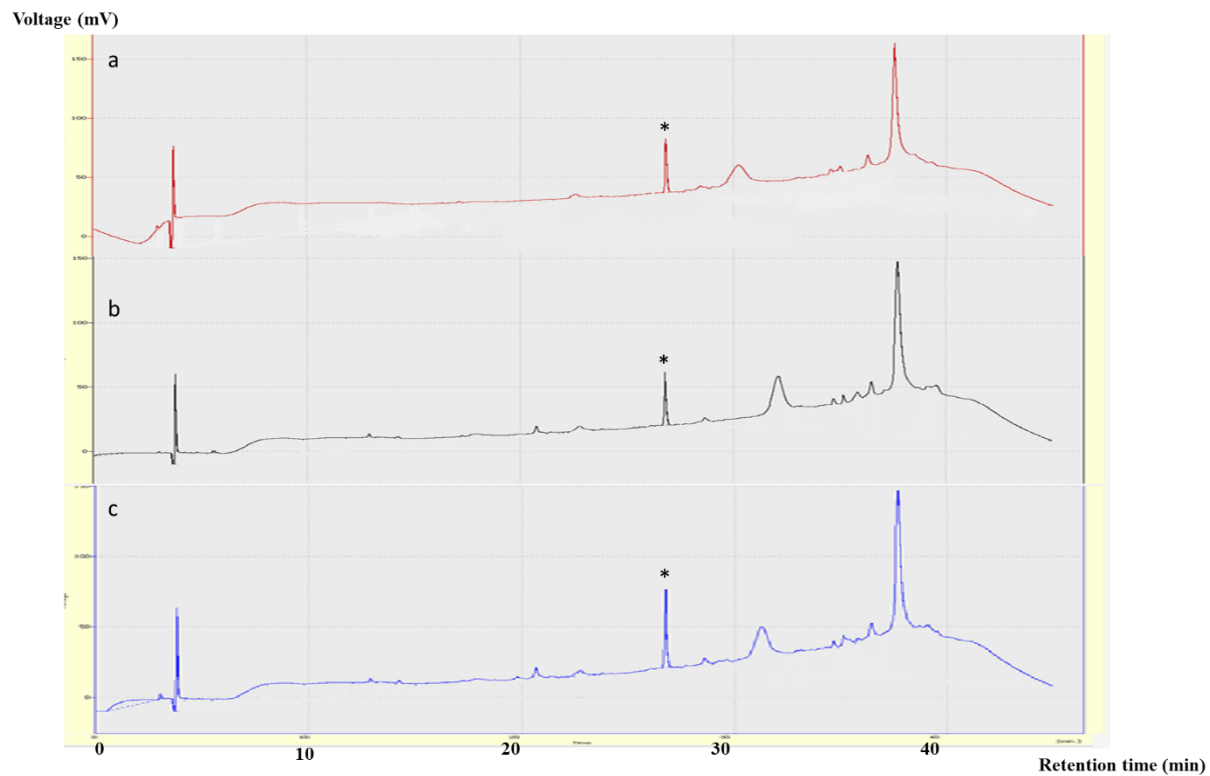

48
